# Supplementary material for: Single-Cell Transcriptome Analysis Highlights a Role for Neutrophils and Inflammatory Macrophages in the Pathogenesis of Severe COVID-19
Source: MDPI journal article supplement (doi:10.3390/cells9112374), 2020-10-29
Supplement: s1 [file s1]

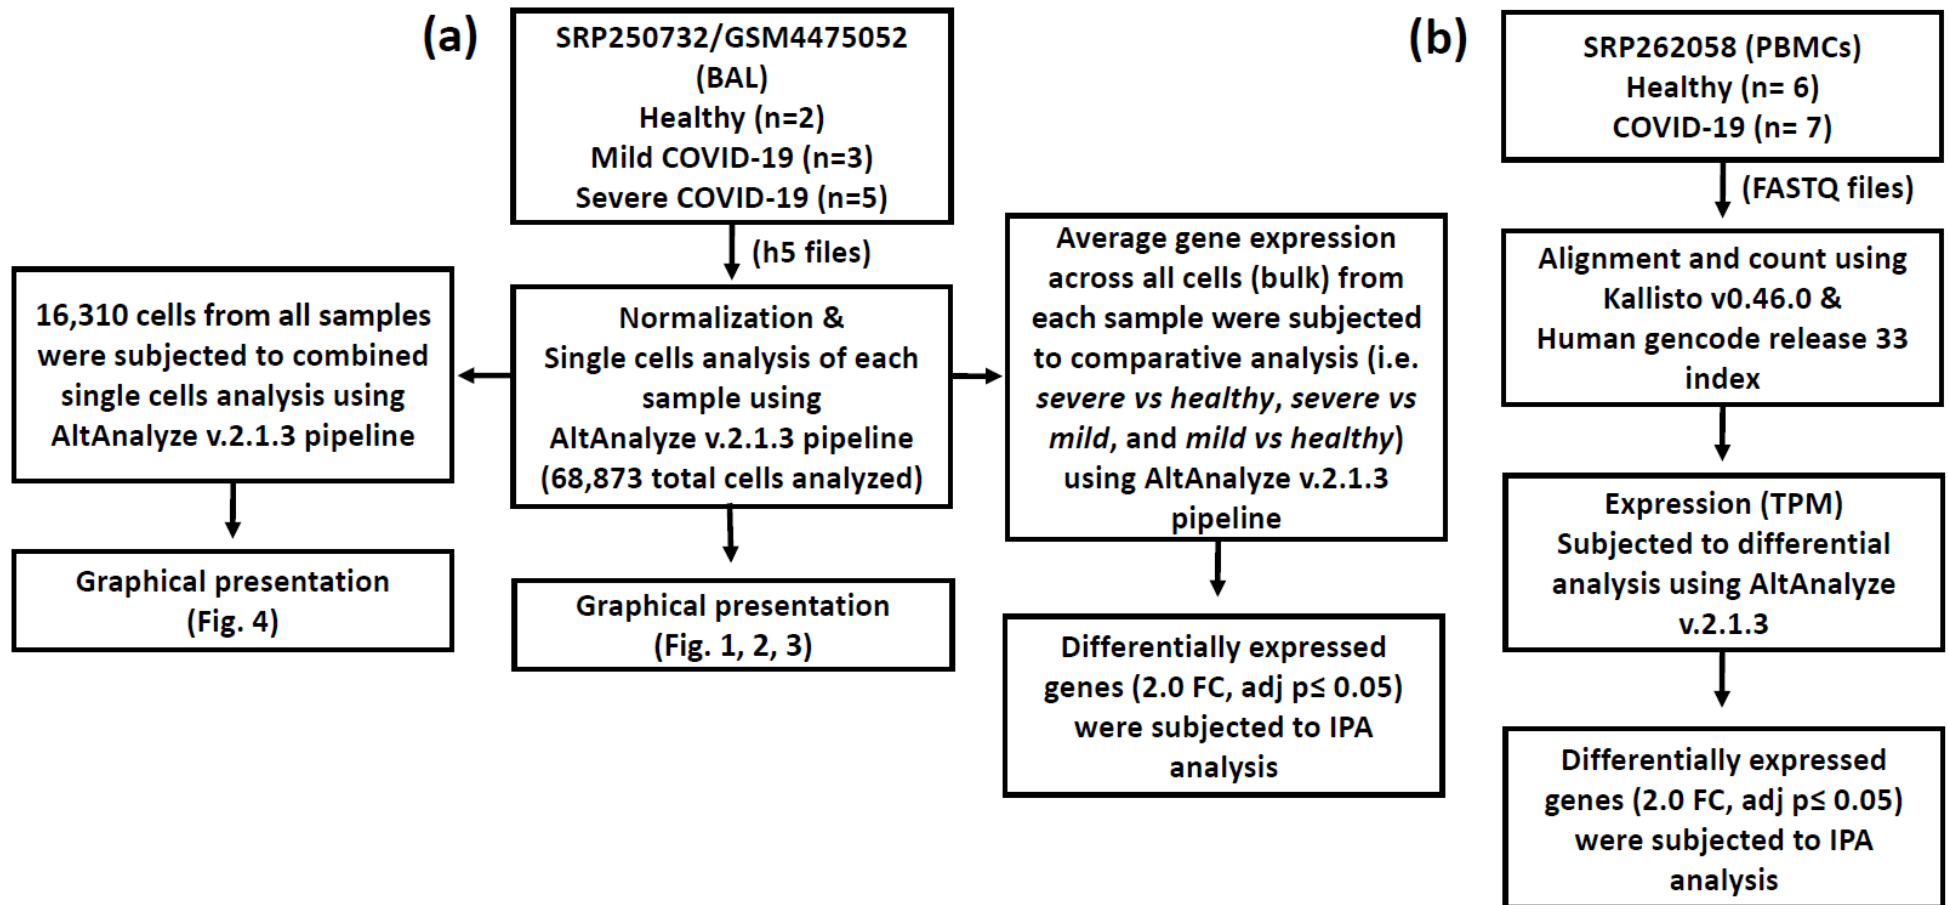

Supplementary figure 1. Schematic presentation of the experimental and bioinformatics workflow for transcriptome analysis from Bronchoalveolar lavage (BAL, a) and peripheral blood mononuclear cells (PBMCs) from COVID-19 patients and healthy subjects.
