# Supplementary material for: Single-Cell Transcriptome Analysis Highlights a Role for Neutrophils and Inflammatory Macrophages in the Pathogenesis of Severe COVID-19
Source: Cells. 2020 Oct 29;9(11):2374. doi: 10.3390/cells9112374 (PMC7693119; doi:10.3390/cells9112374)
Supplement: Supplementary file 1 [file cells-09-02374-s001.zip]

Archive with 8 entries (8 files):
- Supplementary figure 1.pdf
- Supplementary table 1.xlsx
- Supplementary table 2.xlsx
- Supplementary table 3.xlsx
- Supplementary table 4.xlsx
- Supplementary table 5.xls
- Supplementary table 6.xlsx
- Supplementary table 7.xlsx
