# Supplementary material for: Single-Cell Transcriptome Analysis Highlights a Role for Neutrophils and Inflammatory Macrophages in the Pathogenesis of Severe COVID-19
Source: Cells. 2020 Oct 29;9(11):2374. doi: 10.3390/cells9112374 (PMC7693119; doi:10.3390/cells9112374)
Supplement: Supplementary file 1 [file cells-09-02374-s001.zip › Supplementary table 1.xlsx]

## Sheet: FinalMarkerHeatmap_all
Supplementary table 1. Marker genes associated with the indicated cell clusters in healthy, mild and severe COVID-19 BAL cells.
Gene ID	Cluster
FCGR3B	30
CSF3R	30
FFAR2	30
SLC25A37	30
CMTM2	30
NAMPT	30
PROK2	30
SELL	30
IFITM2	30
CXCR2	30
IL1RN	30
S100A8	30
G0S2	30
IFIT2	30
IFIT3	30
FPR1	30
CXCR1	30
LIMK2	30
RSAD2	30
SAT1	30
HERC5	30
LITAF	30
CSF2RB	30
SOD2	30
PLEK	30
ANP32A	30
BCL6	30
GBP1	30
H3F3B	30
TNFSF10	30
GBP5	30
IFIT1	30
RNF213	30
TNFSF13B	30
TNFRSF10C	30
S100A9	30
ANXA3	30
GCA	30
IFITM1	30
IRF7	30
DAPP1	30
MX2	30
IFITM3	30
H3F3A	30
LMNB1	30
CARD16	30
ELF1	30
LRG1	30
CD274	30
MNDA	30
ALPL	30
RNF24	30
PELI1	30
ISG20	30
DDX60L	30
VNN2	30
MMP25	30
MX1	30
BCL2A1	30
SMCHD1	30
TNFAIP6	29
HIST2H2AA4	29
CCL3L1	29
MXD1	29
CLEC4E	29
CCL4L2	29
NFKBIA	29
AQP9	29
PNRC1	29
GBP4	29
NADK	29
NBN	29
ZBP1	29
TNFAIP3	29
ARL5B	29
RHOH	29
IFIH1	29
RNF19B	29
PPP1R15A	29
HIST2H2AC	29
HIST2H2BE	29
IFI44L	29
TREX1	29
IDO1	29
GRAMD1A	29
BAZ1A	29
ZC3HAV1	29
IRF2	29
PLAUR	29
RBBP6	29
HIVEP2	29
SCN1B	29
GBP3	29
PSTPIP2	29
GBP7	29
HIVEP1	29
HIST2H2BF	29
WDFY3	29
ZNF684	29
HIST1H2BG	29
KBTBD2	29
NLGN3	29
P2RY14	29
FST	29
KCND1	29
TSC22D2	29
RELA	29
HCAR3	28
PHACTR1	28
HES4	28
VEGFA	28
HCAR2	28
RALGAPA2	28
CEACAM1	28
CCRL2	28
CARD17	28
FAP	28
TRIM25	28
TBC1D7	28
OSM	28
SLC45A4	28
EGR3	28
STX3	28
DDIT3	28
B3GNT8	28
IVNS1ABP	28
LCP2	28
SP140	28
CPD	28
GK	28
TMEM140	28
PLD6	28
ZNF267	28
SCARF1	28
MEFV	28
LINC00528	28
SLC22A1	28
CLEC1A	28
CSF1	28
DENND3	28
ALDH1A2	28
EPHB1	28
SUCNR1	28
PMAIP1	28
CREBRF	28
ATG2A	28
VPS18	28
FNIP1	28
GLA	28
NLRC5	28
GNAO1	28
EDN1	28
LAMB3	28
HCAR1	28
SLC9A8	28
TNFSF15	28
SEZ6	28
MYLIP	28
LONRF3	28
NFKBID	28
CACNA1A	28
FLCN	28
DNTTIP2	28
SIGLEC5	28
FFAR1	28
LIF	28
EPG5	28
PI3	3
SLAMF7	3
PLAU	3
SGTB	3
CD22	3
TNFSF14	3
CXCR4	3
MAP4K4	3
SQSTM1	3
RALGDS	3
PPIF	3
DNAH17	3
ORM1	3
CIR1	3
GABARAPL2	3
IRAK2	3
SLC7A11	3
RASSF2	3
CLCN7	3
MAFF	3
KATNBL1	3
TNFRSF1B	3
LRRC70	3
LPCAT1	3
UBALD2	3
PAG1	3
RILPL2	3
SLC15A4	3
TECPR2	3
SPAG9	3
SEC22B	3
TNFRSF14	3
NFKB2	3
CAMKK2	3
SLC25A13	3
NOP10	3
KDM6B	3
PLXNC1	3
OTOA	3
ZC3H12A	3
CD300A	3
TOM1	3
ZFYVE16	3
UBE2B	3
DOCK4	3
TCFL5	3
MBP	3
CHRNA10	3
NSMAF	3
C10orf55	3
TRPM2	3
PPIAL4G	3
AKIRIN2	3
NLN	3
SRPK1	3
ITGA7	3
MAP1LC3B	3
PLK3	3
IRAK3	3
TANK	3
MT1H	23
MT1M	23
MT1G	23
MT1A	23
MT1F	23
SHB	23
ZFP28	23
SHPK	23
COL4A2	23
ACSM5	23
MDGA1	23
C5orf34	23
BMF	23
INTS7	23
SLX4	23
DDX49	23
ZNF140	23
MED16	23
GDPD5	23
SLC19A2	23
MPND	23
HMBOX1	23
VCAN	27
S100A12	27
FCN1	27
CD300E	27
CKAP4	27
CFP	27
ASGR2	27
FGL2	27
RIN2	27
CD14	27
MPEG1	27
DUSP6	27
SERPINB9	27
LILRA5	27
CDA	27
MEF2C	27
METTL9	27
GLIPR1	27
OLIG1	27
PTPRE	27
DYSF	27
LGALS2	27
COTL1	27
SAT2	27
EXT1	27
NRG1	27
RAB31	27
TMEM217	27
AP1S2	27
LDLR	27
OLIG2	27
MTMR11	27
PKM	27
MCL1	27
NAIP	27
ITGB2	27
ARRB2	27
SOCS3	27
EAF1	27
PRELID1	27
SLC2A3	27
TNFSF18	27
IL6R	27
MBOAT7	27
ITGAM	27
SERTAD1	27
CNP	27
ZYX	27
HIF1A	27
F5	27
PADI4	27
CMPK2	27
RBMS1	27
FAM72A	27
TNFRSF1A	27
LRRFIP2	27
CSRNP1	27
SLC38A2	27
C19orf38	27
SULF2	27
CCL8	21
HPSE	21
DEFB1	21
IL4I1	21
APOBEC3A	21
SPHK1	21
ATF5	21
RGL1	21
FOS	21
TYMP	21
IL1R2	21
IFI30	21
CH25H	21
SGK1	21
LILRB4	21
KLF4	21
VAMP5	21
FOSB	21
LILRB2	21
DUSP1	21
CXCL11	21
RHOB	21
CCL3	21
CALM1	21
CDKN1A	21
HESX1	21
LAIR1	21
SSB	21
NLRP3	21
IFNGR2	21
GNG5	21
TPM4	21
NAPA	21
IFI35	21
CD47	21
GSTO1	21
LGALS9	21
PER1	21
IL27	21
ARF6	21
LAP3	21
APOBEC3B	21
NINJ1	21
CBR1	21
SRGAP2	21
OTUD1	21
UBE2F	21
SLC43A2	21
ZFP36	21
SPTLC2	21
TSC22D3	21
PDXK	21
ATP6V1F	21
MARCKS	21
TPM3	21
RGS2	21
KLF6	21
RIPK2	21
TCIRG1	21
MT2A	21
CXCL3	19
THBS1	19
CXCL2	19
CXCL1	19
RNASE1	19
OLFML2B	19
ANGPTL4	19
IER3	19
ADM	19
HS3ST1	19
RCAN1	19
TCN2	19
IDH1	19
TUBA1C	19
PLIN2	19
IL3RA	19
GADD45A	19
VWA5A	19
ETS2	19
IL6	19
MPP1	19
CREG1	19
ANXA4	19
SLC3A2	19
KCTD14	19
MANF	19
HLX	19
ARRDC3	19
LPAR6	19
CMKLR1	19
SPCS3	19
SNX1	19
AIFM2	19
CCL13	19
SEC61A1	19
CLMP	19
PPIB	19
KITLG	19
ADORA3	19
MERTK	19
CEBPD	19
SDF2L1	19
FCGR2B	19
BLVRB	19
SMIM3	19
HM13	19
ABLIM3	19
SOAT1	19
OSGIN1	19
SLC38A7	19
AMPH	19
LAMP1	19
P4HB	19
LRRC59	19
HSPA5	19
PSMB7	19
PDIA4	19
KLF2	19
OAS1	19
MFSD1	19
SERPINB2	7
CYP1B1	7
MMP19	7
CCL7	7
TMEM158	7
CCL2	7
CD93	7
TIMP1	7
MAP3K7CL	7
PHLDA1	7
SEMA6B	7
EMP1	7
SDC2	7
FLNA	7
MAFB	7
ANPEP	7
SPP1	7
C15orf48	7
PID1	7
P2RX7	7
THBD	7
DOT1L	7
BCAT1	7
CD163	7
CHST15	7
HMGA1	7
ATP13A3	7
SH3BGRL3	7
PITPNA	7
CTSB	7
S100A10	7
C1orf122	7
EMP3	7
P2RX4	7
METRNL	7
PHLDA2	7
FNIP2	7
CSTB	7
SLC39A8	7
MYADM	7
ANXA5	7
ENO1	7
RHOBTB3	7
RNASE2	7
MT1X	7
FAM20A	7
METTL7B	7
VIM	7
UPP1	7
IFI27	7
CCR1	7
LACC1	7
ASPH	7
LMNA	7
SLC16A6	7
FABP5	7
ACTG1	7
KIAA0930	7
ADAM9	7
NRIP3	7
LGMN	6
PLA2G7	6
PLTP	6
SDS	6
PMP22	6
CD276	6
RGS1	6
TTYH3	6
FPR3	6
A2M	6
SDC3	6
CTSZ	6
TGFBI	6
SMPDL3A	6
MRAS	6
PLBD2	6
RALA	6
MFSD12	6
GAL3ST4	6
SDSL	6
MMP14	6
TREM2	6
LHFPL2	6
ADAMDEC1	6
ACP2	6
HSD3B7	6
TM4SF19	6
ABHD12	6
SLC48A1	6
ME2	6
SLC16A10	6
TMEM37	6
CD84	6
MMP2	6
GPR137B	6
HMOX1	6
GPR183	6
PLD4	6
ETV5	6
ST14	6
HTRA1	6
ABCA1	6
KCNJ5	6
NPL	6
RAB42	6
SLC7A8	6
ACOT13	6
RAB3IL1	6
TSPAN33	6
TNFRSF12A	6
TNS3	6
TOMM40	6
TUBB6	6
ATP6V1A	6
FAM198B	6
CD209	6
CLEC11A	6
CALU	6
SLC17A9	6
NRP1	6
HLA-DQA2	20
C1QC	20
NUPR1	20
CXCL10	20
TCEA3	20
NEXN	20
STAC3	20
STAP1	20
HLA-DRB5	20
MS4A6A	20
RAB8A	20
PLA2G16	20
CD1D	20
LILRB1	20
SCIMP	20
C2orf74	20
HNMT	20
LY86	20
C1QB	20
SIDT2	20
RBP4	20
CD72	20
PECAM1	20
DST	20
PILRA	20
DBNDD2	20
TBC1D4	20
SYNGR2	20
MIS18BP1	20
TSPAN4	20
MS4A7	20
PDE4DIP	20
RASSF4	20
C1QA	20
LGALS3BP	20
NBPF14	20
MINK1	20
RNASET2	20
LAMB1	20
C7orf50	20
NRIP1	20
CD81	20
MS4A4A	20
C1orf162	20
FGD2	20
PKD2L1	20
HDDC2	20
AXL	20
HMGN2	20
ABI3	20
CRTAP	20
BLOC1S2	20
ZNF385A	20
CD4	20
NR1H2	20
HLA-DMB	20
ATOX1	20
CPED1	20
LRP1	20
NME2	20
CCL18	24
HLA-DQA1	24
TNFSF13	24
FN1	24
PLBD1	24
STAC	24
CYP27A1	24
FBP1	24
PPIC	24
FFAR4	24
COMT	24
ABCG1	24
CES1	24
PDLIM1	24
COLEC12	24
ALDH2	24
GPD1	24
SERPING1	24
MME	24
NAPSA	24
ACP5	24
PTPMT1	24
MDK	24
HEXB	24
EDEM2	24
ADTRP	24
FHL1	24
VAT1	24
MARCO	24
HLA-DQB2	24
HLA-DQB1	24
CCL23	24
PHLDA3	24
PPARG	24
ACOT2	24
DNASE2	24
CA2	24
DNASE2B	24
MDH1	24
RMDN3	24
CAT	24
PLD3	24
GSN	24
PEBP1	24
GLB1	24
OSCAR	24
CTSC	24
LTA4H	24
CD9	24
SERPINA1	24
PROCR	24
MGST3	24
AMZ1	24
GAA	24
ALAS1	24
PPT1	24
PEPD	24
BHLHE41	24
C20orf27	24
SCPEP1	24
APOE	12
LYZ	12
APOC1	12
HLA-DPB1	12
HLA-DRA	12
CSTA	12
HLA-DRB1	12
CFD	12
HLA-DPA1	12
NDUFB8	12
GPNMB	12
GPX3	12
HLA-DMA	12
SCD	12
CLEC12A	12
PSAP	12
TMSB4X	12
CST3	12
CTSS	12
EIF3E	12
PFDN5	12
TMBIM4	12
FTH1	12
UQCRB	12
HEXA	12
PABPC4	12
LY96	12
UQCR11	12
PARL	12
POLR2L	12
SLC24A4	12
TTC14	12
POLR2J3	12
NDUFA11	12
PNPLA3	12
NDUFC2	12
GPR34	12
RNASEK-C17orf49	12
VKORC1	12
RSL24D1	12
A1BG	12
PIAS2	12
SH3D21	12
N4BP2L2	12
RBMX	12
CHML	12
ZNF589	12
PHKG1	12
ITLN1	12
CHMP4A	12
ABCC3	12
KNOP1	12
PEBP4	12
INHBA	11
RETN	11
FABP4	11
MRC1	11
IGF1	11
HP	11
TGM2	11
PNPLA6	11
OLR1	11
ALOX5AP	11
LPL	11
TSPO	11
C8B	11
TCF7L2	11
TFRC	11
VSIG4	11
VMO1	11
TNNI2	11
LST1	11
CD52	11
CRIP1	11
UBB	11
CPE	11
ESRRA	11
NDUFB1	11
TCEAL8	11
CYSLTR1	11
RSPO3	11
SVIL	11
NDUFA4	11
EVI2B	11
S100A4	11
COX7C	11
ACSM3	11
ARRDC4	11
ARL6IP1	11
COMMD6	11
NDUFA13	11
UBA52	11
MMD	11
SNRPB2	11
ZBTB8OS	11
DPYSL2	11
DYNC1I2	11
KLK1	11
LSAMP	11
NDUFA7	11
HPGDS	11
CATSPER1	11
APOL4	11
RTN1	11
CHRM3	11
CEBPA	11
DCSTAMP	11
CHMP3	11
NMT1	11
AOC3	11
EMC10	11
EIF2S2	11
SLC25A6	11
KLRD1	18
GNLY	18
PRF1	18
SH2D1B	18
NKG7	18
KLRF1	18
KLRC3	18
CST7	18
TNFRSF18	18
XCL1	18
IL2RB	18
TMIGD2	18
LAIR2	18
KIR2DL4	18
FGFBP2	18
PYHIN1	18
C1orf21	18
KIR2DL1	18
XCL2	18
CCND2	18
CD38	18
IL18RAP	18
PITPNM2	18
EOMES	18
PTGDS	18
MATK	18
STAT4	18
KIR3DL2	18
KRT86	18
CCL4	18
AREG	18
NCAM1	18
TGFBR3	18
GNPTAB	18
KLRC2	18
S100B	18
ATP8A1	18
SPON2	18
PDE4D	18
KIR3DL1	18
KIR2DL3	18
MCTP2	18
SLFN5	18
L3HYPDH	18
ARAP2	18
LNPEP	18
CLEC2B	18
PPP3CC	18
S1PR5	18
PPM1K	18
SMAGP	18
PTGDR	18
IQGAP2	18
MYBL1	18
FEZ1	18
NCR3	18
GOLGA8A	18
RRAS2	18
USP9Y	18
GFOD1	18
IRF4	34
ICOS	34
IL12RB2	34
CTLA4	34
CD28	34
BCL2L14	34
ZBTB32	34
IPCEF1	34
FAM83D	34
CLDND1	34
GRK5	34
P2RY10	34
CDK1	34
BCL2L11	34
OXCT1	34
BTBD11	34
ENDOD1	34
LAMP3	34
AKAP2	34
BUB1	34
VSTM4	34
LPIN2	34
ROR2	34
BRIP1	34
HIST1H2AI	34
SOX12	34
VPS37B	34
CXCL13	34
HIST1H2AJ	34
ANAPC1	34
HAUS3	34
KDELC2	34
AGMAT	34
HPRT1	34
ITPR1	34
TBC1D1	34
MMS22L	34
TK1	34
TRANK1	34
CDC25C	34
SBK1	34
TRAFD1	34
UHRF2	34
HNRNPUL1	34
SLX1B	34
NUDCD1	34
NCAPG2	34
BIRC2	34
SLC9A9	34
ANKRD55	34
FAM126A	34
OSBPL7	34
DDX60	34
SPDYA	34
SLC4A10	34
SARS2	34
C1R	34
HIST1H2AL	34
SKA3	34
GIT2	34
TRAT1	10
CCR7	10
IL7R	10
MAL	10
LTA	10
TNFRSF4	10
SOCS2	10
SPOCK2	10
S1PR1	10
PIM2	10
GPR171	10
TNFRSF25	10
FLT3LG	10
CCR6	10
IL2RA	10
BCL2	10
MYC	10
DGKA	10
FBLN7	10
GREM2	10
CD5	10
LEF1	10
IRS1	10
PLSCR3	10
OCIAD2	10
P2RY8	10
TRADD	10
TMEM156	10
TCF7	10
SATB1	10
MLLT3	10
CISH	10
AP3M2	10
CYTIP	10
RASGRP1	10
TXK	10
KDSR	10
RGS16	10
PRKX	10
DPP4	10
ICAM2	10
TESPA1	10
KCNA3	10
GATA3	10
CYLD	10
BTG1	10
BACH2	10
PIK3IP1	10
FOXP3	10
TMEM204	10
KIF5C	10
NPDC1	10
TTC39C	10
CSGALNACT1	10
SRSF7	10
FXYD7	10
RNF157	10
ERN1	10
FBXL8	10
SLAMF1	10
CD8B	4
CD8A	4
PTPRCAP	4
CD3E	4
CCL5	4
LAG3	4
GZMH	4
CD3G	4
GZMA	4
GZMB	4
ZNF683	4
CD7	4
CD3D	4
LCK	4
ITGA1	4
CD27	4
GZMM	4
SIT1	4
THEMIS	4
CD2	4
CD96	4
CXCR3	4
IL32	4
CXCR6	4
GZMK	4
HOPX	4
LIME1	4
TRAF3IP3	4
SH2D2A	4
CLEC2D	4
ITM2C	4
GPR25	4
NFATC2	4
ZAP70	4
LIMD2	4
IKZF3	4
CTSW	4
FYN	4
SH2D1A	4
CD70	4
LAT	4
KLRC1	4
RARRES3	4
STK17A	4
GNG2	4
ETS1	4
CLIC3	4
CBLB	4
APOBEC3H	4
CORO1A	4
CD247	4
SKAP1	4
LBH	4
SAMD3	4
PTPN7	4
GRAP2	4
RUNX3	4
CD6	4
SLA2	4
ITM2A	4
LTB	14
KLRB1	14
TRBC1	14
C1orf56	14
C6orf48	14
CD40LG	14
B3GAT2	14
HNRNPH1	14
ARHGAP11B	14
SYNC	14
VAMP2	14
XYLT2	14
NMT2	14
LAX1	14
IL26	14
TRIM59	14
PPP3CA	14
SNURF	14
RGPD5	14
ZNF566	14
HCRT	14
FBXL17	14
ZNF131	14
ANGPT2	14
SERPINB3	22
CYP2F1	22
MSMB	22
MUC5B	22
ASS1	22
BPIFB1	22
SCGB1A1	22
SCGB3A1	22
CREB3L1	22
AQP5	22
FAM3D	22
SCNN1B	22
KRT7	22
NOTCH3	22
UPK1B	22
UGT2A1	22
KLK11	22
CXCL17	22
CYP2B6	22
BPIFA1	22
LCN2	22
CAPN8	22
PRSS8	22
PRSS23	22
CXCL6	22
GABRP	22
MSLN	22
CP	22
TSPAN8	22
LYPD2	22
SERPINB11	22
RIMS1	22
NTS	22
ATP12A	22
FUT6	22
ADIRF	22
ERN2	22
SLC4A4	22
MALL	22
RAI14	22
S100A16	22
MUC5AC	22
F3	22
CEACAM6	22
KIAA1324	22
SLC6A14	22
CYP2A13	22
CEACAM5	22
S100A14	22
SDC1	22
SLC5A8	22
A4GALT	22
ASAP2	22
CAV2	22
LAMB2	22
CLCA2	22
PTPRZ1	22
LY6D	22
KRT5	22
SEMA3F	22
MTRNR2L8	8
MTRNR2L12	8
TAOK1	8
MTRNR2L1	8
PIGX	8
MTRNR2L6	8
MTRNR2L4	8
PIWIL1	8
HBA2	13
HBA1	13
HBB	13
HBM	13
ALAS2	13
SLC25A39	13
HBD	13
PDZK1IP1	13
GYPC	13
SNCA	13
TRIM58	13
DCAF12	13
STRADB	13
ADIPOR1	13
FAM210B	13
CA1	13
FKBP8	13
FBXO7	13
HBQ1	13
PHOSPHO1	13
HEMGN	13
R3HDM4	13
SLC4A1	13
AHSP	13
PIFO	2
LDLRAD1	2
EFCAB1	2
DNAH12	2
LRRC46	2
RSPH1	2
C9orf24	2
ZMYND10	2
C1orf194	2
SNTN	2
TPPP3	2
C20orf85	2
MS4A8	2
AGR3	2
FAM183A	2
DYNLRB2	2
FAM92B	2
CCDC78	2
WDR38	2
LRRIQ1	2
C5orf49	2
CCDC17	2
FAM216B	2
DNALI1	2
TSPAN1	2
TEKT1	2
FOXJ1	2
C9orf116	2
FXYD3	2
DNAH5	2
C11orf88	2
SPAG17	2
FAM81B	2
CAPSL	2
FAM166B	2
EFHC1	2
OMG	2
DNAH10	2
RSPH4A	2
CCDC113	2
DNAH9	2
ROPN1L	2
CDHR3	2
CDHR4	2
TSPAN19	2
SPATA18	2
C9orf135	2
TMEM231	2
SLC44A4	2
CYP4B1	2
TMC5	2
CAPS	2
CTXN1	2
FANK1	2
ALOX15	2
CKB	2
C6orf118	2
MORN5	2
TUSC3	2
GSTA1	2
