# Supplementary material for: Single-Cell Transcriptome Analysis Highlights a Role for Neutrophils and Inflammatory Macrophages in the Pathogenesis of Severe COVID-19
Source: Cells. 2020 Oct 29;9(11):2374. doi: 10.3390/cells9112374 (PMC7693119; doi:10.3390/cells9112374)
Supplement: Supplementary file 1 [file cells-09-02374-s001.zip › Supplementary table 2.xlsx]

## Sheet: GE.severe_vs_control-fold2.0_ad
Supplementary table 2 . Differentially expressed genes in BAL cells from Severe COVID-19 vs healthy subjects.
GeneID (Regulation criterion: fold > 2.0 and adjp p-value < 0.05)	severe_vs_control-log_fold	severe_vs_control-p_value
IFITM3	4.76725	0
TAOK1	3.86286	0
ISG15	3.85355	0
IFITM1	3.79844	0
CCL2	3.75683	0
IFITM2	3.43704	0
H3F3B	3.26246	0
SAT1	3.12092	0
MTRNR2L12	3.08216	0
IFIT3	2.94911	0
RSAD2	2.86703	0
MT2A	2.76013	0
MX1	2.73171	0
IFIT2	2.68975	0
IFIT1	2.60759	0
ISG20	2.58024	0
MT-ND4L	2.44061	0
KLF6	2.43615	0
SRGN	2.40159	0
IL1RN	2.21924	0
S100A8	2.14722	2.3264e-273
IFI30	2.14418	0
NAMPT	2.10841	0
IRF7	2.05908	0
DUSP1	2.05639	0
CCL8	2.01416	0
HLA-E	1.98395	0
IFI27	1.95285	3.42079e-293
LY6E	1.94799	0
TNFSF10	1.9226	0
MT-ATP8	1.87736	0
RNF213	1.86217	0
NFKBIA	1.85116	0
CXCL8	1.84656	0
IFI6	1.81728	0
BCL2A1	1.81442	0
GBP1	1.78454	0
MX2	1.78242	0
APOBEC3A	1.75036	0
CCL3	1.72745	0
ATP6V0C	1.7041	0
CTSL	1.6846	1.14035e-215
C15orf48	1.68144	0
TYMP	1.66979	0
ZFP36	1.66242	0
HLA-C	1.65157	0
CCL3L1	1.59297	1.39452e-295
PLSCR1	1.58083	0
FOS	1.56441	8.93804772644e-318
GNG5	1.5274	0
IFI44L	1.52117	0
CCL4	1.50635	3.06632e-239
MARCKS	1.48007	0
CCL7	1.4693	1.28349e-291
CXCL10	1.46486	5.57001e-261
OASL	1.42686	0
IER2	1.41863	0
HERC5	1.40104	0
TNFSF13B	1.36934	0
PPP1R15A	1.35921	0
CCL4L2	1.34837	4.77084e-217
TIMP1	1.34359	1.01054e-190
PLEK	1.33683	1.35322e-275
JUNB	1.33644	3.12249488172e-321
UBE2L6	1.32206	0
MAFB	1.31744	7.24300236803e-321
XAF1	1.30286	0
TPM4	1.26641	0
CLIC1	1.25527	6.9289e-234
NEAT1	1.24208	5.4348e-154
TAP1	1.24137	0
LCP2	1.22552	0
DDX60L	1.22335	4.587178116e-315
SQSTM1	1.21205	3.75747e-231
HLA-B	1.19176	1.07399e-246
CCR1	1.18848	0
NINJ1	1.1847	0
ACTB	1.17627	1.44229e-146
GAPDH	1.17431	3.6389e-160
LYN	1.16106	3.02848e-307
OAS1	1.15841	1.54899e-293
NAPA	1.15263	0
VAMP5	1.14173	2.90455958306e-311
PSMB9	1.13813	4.37898e-232
EPSTI1	1.1376	4.84412e-292
IER3	1.12758	4.23343e-294
PARP14	1.11729	1.72436e-283
LITAF	1.11589	5.69552e-175
IFI44	1.10237	6.61361654278e-312
IFI16	1.0992	7.21251e-253
MYL12A	1.08278	5.76528e-165
FPR1	1.08049	2.05244e-236
TNFAIP3	1.06301	3.66274e-272
OAS2	1.05892	4.51066618618e-318
CALM1	1.05609	6.24146e-148
MT-ND6	1.0556	2.91138e-180
OAS3	1.05463	0
DUSP6	1.04758	3.40066e-280
ACTG1	1.03735	4.62323e-132
SMCHD1	1.03588	5.17855e-248
HIF1A	1.03205	1.6228e-270
IFIH1	1.03179	1.82297e-302
ELF1	1.02913	3.17351e-243
SLC25A37	1.02194	1.88138e-224
SGK1	1.01593	2.39926e-225
GADD45B	1.0103	4.83319e-233
SERPINB2	1.00795	1.1699e-163
TSC22D3	1.00287	2.67587e-238
CTSS	-1.03363	3.84227e-158
VAMP8	-1.04585	1.92218e-247
TYROBP	-1.04883	1.14696e-114
NDUFA4	-1.05923	4.53422e-241
OLR1	-1.06269	0
RPL29	-1.06986	2.16985e-159
TUBA1B	-1.08269	1.42452e-223
TFRC	-1.08433	0
SCD	-1.08601	0
RPS28	-1.09394	9.05543e-146
COMMD6	-1.10802	4.76869e-270
TOMM7	-1.11002	4.41969e-277
UQCRB	-1.11968	3.03071e-256
FTL	-1.1317	5.00801e-164
GPNMB	-1.15104	0
CALM2	-1.1594	1.02314e-241
NDUFB1	-1.1635	1.32262e-304
RPL4	-1.16604	1.82411e-285
RPS9	-1.20453	4.6498e-214
CTSC	-1.2108	2.38885e-253
RPL14	-1.21153	2.13772e-202
CFD	-1.21277	0
MALAT1	-1.23116	7.12152e-189
TSPO	-1.25604	7.00486e-291
RPL5	-1.25655	1.82747e-261
RPS13	-1.28488	5.11325e-205
RPL6	-1.28938	3.63744e-238
RPL22	-1.29604	4.97649e-256
LST1	-1.31133	0
RPL19	-1.31718	2.73737e-218
FBP1	-1.31861	0
MT-ND2	-1.32494	7.52984e-184
RPL39	-1.34482	4.60801e-194
ALDH2	-1.36374	0
GRN	-1.36382	1.33231e-266
UBA52	-1.37044	2.47831e-284
ACP5	-1.37777	0
RPL9	-1.38485	2.56859e-284
COX7C	-1.40628	0
RPS3	-1.41505	7.00454e-257
RPS3A	-1.42392	1.09294e-282
RETN	-1.42539	0
EEF1A1	-1.45969	4.54075e-237
HLA-DMA	-1.45994	0
PSAP	-1.47278	5.7671e-248
MS4A7	-1.49383	0
RPS12	-1.49459	1.40664e-245
SNHG25	-1.51216	0
RPL36	-1.51704	6.06886e-298
RPS11	-1.52332	0
ALOX5AP	-1.53009	0
RPS5	-1.53528	0
GCHFR	-1.54301	0
S100A4	-1.55237	8.88434e-277
PFDN5	-1.56355	0
LTA4H	-1.58741	0
RPS16	-1.60987	0
RPLP1	-1.65128	6.2461808659e-312
RPL35A	-1.65617	0
UBB	-1.66209	0
CSTA	-1.68316	0
RPS15	-1.68502	0
RPL18A	-1.7149	0
RPS8	-1.71687	0
RPL10A	-1.7172	0
RPS23	-1.74434	0
CRIP1	-1.7838	0
RPL12	-1.80234	0
CST3	-1.81326	0
RPL41	-1.83083	0
RPL27	-1.845	0
RPL23	-1.86489	0
RPL11	-1.90144	0
RPL7	-1.9044	0
RPL32	-1.92766	0
RPS4X	-1.96163	0
RPL3	-1.96922	0
RPL15	-1.97286	0
RPS2	-1.99816	0
RPS15A	-2.02059	0
RPL13	-2.03448	0
RPS25	-2.0506	0
MARCO	-2.06738	0
RPS14	-2.10457	0
RPL38	-2.11931	0
HLA-DQA1	-2.12256	0
RPL36A	-2.18749	0
RPL37A	-2.23854	0
RPL35	-2.24613	0
RPL10	-2.27719	0
RPS10	-2.28112	0
RPS27A	-2.28584	0
RPLP2	-2.28668	0
RPL23A	-2.32454	0
HLA-DQB1	-2.35004	0
RPL26	-2.40961	0
RPS6	-2.43407	0
RPL34	-2.46112	0
RPL17	-2.46648	0
NUPR1	-2.49335	0
TMSB4X	-2.56793	0
HLA-DPA1	-2.58239	0
CD52	-2.60166	0
RPS19	-2.68506	0
RPS27	-2.74059	0
HLA-DRB5	-2.76096	0
RPS18	-2.7736	0
HLA-DPB1	-2.82121	0
CD74	-2.84972	0
RPL31	-2.901	0
RPS17	-2.93184	0
RPS29	-3.05488	0
RPS20	-3.20381	0
RPL27A	-3.25702	0
FABP4	-3.3379	0
RPL13A	-3.40761	0
HLA-DRB1	-3.51835	0
C1QA	-3.57843	0
RPL21	-3.60077	0
C1QB	-3.66442	0
LYZ	-3.72146	0
HLA-DRA	-3.98673	0
APOE	-4.32319	0
APOC1	-5.88615	0
