# Supplementary material for: Single-Cell Transcriptome Analysis Highlights a Role for Neutrophils and Inflammatory Macrophages in the Pathogenesis of Severe COVID-19
Source: Cells. 2020 Oct 29;9(11):2374. doi: 10.3390/cells9112374 (PMC7693119; doi:10.3390/cells9112374)
Supplement: Supplementary file 1 [file cells-09-02374-s001.zip › Supplementary table 3.xlsx]

## Sheet: GE.mild_vs_control-fold2.0_adjp
Supplementary table 3. Differentially expressed genes in BAL cells from mild COVID-19 vs healthy subjects.
GeneID (Regulation criterion: fold > 2.0 and adjp p-value < 0.05)	mild_vs_control-log_fold	mild_vs_control-p_value
MT-ATP8	4.44741	0
MTRNR2L12	3.84511	0
MT-ND4L	3.77132	0
TAOK1	3.33175	0
IFITM3	2.84343	0
MT-ND6	2.63141	0
IFIT2	2.31634	0
IFIT1	2.12242	0
CXCL10	2.02971	0
MT-ND5	2.00956	2.25014e-234
IFIT3	1.97753	0
IFI6	1.90974	1.59519079568e-313
ISG15	1.89065	0
ATP6V0C	1.67573	0
MX1	1.67304	0
TNFSF10	1.5813	0
C1QC	1.56371	3.22425e-161
ALDOA	1.44204	0
HLA-DQA2	1.40576	0
MT2A	1.39424	9.75882e-191
MTRNR2L8	1.38994	0
IFI30	1.28165	2.67786e-219
NME2	1.23775	0
LY6E	1.23328	2.33418e-156
IFITM1	1.23137	3.30549e-293
MT-ND1	1.22515	1.04419e-101
HBB	1.22405	9.85912e-120
MT-CO2	1.18963	4.00927e-97
OAS1	1.17577	0
IRF7	1.17317	0
MT-CYB	1.15911	1.61992e-70
OASL	1.15293	0
RSAD2	1.1318	0
UBE2L6	1.10601	0
PSMA6	1.03343	0
IFI27	1.02817	5.81463e-94
HLA-DQB1	-1.0062	3.86555e-112
RETN	-1.05944	9.32921e-182
RPL14	-1.07023	1.84787e-148
C1QB	-1.08584	4.89615e-75
PTMA	-1.08824	2.64223e-136
RPL8	-1.09539	2.17679e-148
HLA-DRB5	-1.14349	1.89323e-116
FCER1G	-1.14446	6.65603e-120
RPL5	-1.14575	1.89861e-223
PFDN5	-1.14637	3.93389e-177
CYBA	-1.15024	1.39805e-142
HLA-DPA1	-1.17311	7.08886e-118
FAU	-1.18597	1.54983e-158
RPS3A	-1.19189	2.48204e-186
RPL19	-1.20861	2.6511e-159
C1QA	-1.21114	8.27083e-103
RPL6	-1.22229	2.69376e-203
S100A6	-1.23172	5.83156e-137
RPL22	-1.24632	2.73173e-220
NEAT1	-1.24828	8.77249e-220
CTSD	-1.25561	3.23339e-159
RPS5	-1.27125	1.01674e-238
RPS24	-1.27178	8.00118e-188
CSTA	-1.29701	0
EEF1A1	-1.32219	4.87227e-163
RPS9	-1.34595	1.43383e-233
FABP4	-1.34965	2.37892e-153
LGALS1	-1.35255	1.06413e-210
PSAP	-1.35449	9.85836e-163
UBA52	-1.3686	3.20686e-262
RPL10A	-1.39632	1.86162e-306
EIF1	-1.41959	4.34514e-269
RPS12	-1.43427	1.925e-216
RPS3	-1.44079	9.72003e-257
ATP5F1E	-1.44137	3.0338e-247
CRIP1	-1.48365	0
RPL9	-1.49113	2.53788e-308
RPS11	-1.51158	0
SNHG25	-1.52344	0
RPS23	-1.538	2.63063e-252
RPL36	-1.54195	6.42175e-283
HLA-DPB1	-1.54865	2.85374e-241
CD74	-1.59653	3.33855e-145
TYROBP	-1.59912	1.86483e-163
TMSB10	-1.60529	1.10932e-187
RPS28	-1.60762	5.75823e-255
RPS13	-1.62384	1.95447e-306
RPL3	-1.62493	0
RPL15	-1.67687	0
RPL18A	-1.68362	0
S100A4	-1.68535	1.91027e-285
CST3	-1.68653	9.1604e-238
RPS15	-1.70624	0
RPL23	-1.70694	0
RPS4X	-1.71666	0
RPL35A	-1.78619	0
RPL27	-1.78971	0
RPS25	-1.82365	0
RPL12	-1.8359	0
RPS8	-1.8771	0
RPS16	-1.8973	0
RPS14	-1.92976	0
RPL11	-1.93888	0
RPS2	-1.94354	0
RPL37A	-1.94396	0
RPL32	-1.95565	0
RPL38	-1.99462	0
RPLP1	-2.00634	0
RPL23A	-2.00691	0
FTL	-2.03805	2.83347e-198
RPL41	-2.04573	0
CD52	-2.05266	0
RPL7	-2.06051	0
RPL39	-2.07791	0
RPL13	-2.08967	0
HLA-DRB1	-2.09793	2.42796e-307
RPL35	-2.13741	0
FTH1	-2.16969	5.16633e-242
RPS6	-2.25437	0
RPS19	-2.26083	0
RPS15A	-2.29467	0
RPL17	-2.31143	0
RPS27A	-2.40622	0
RPL36A	-2.41572	0
RPS10	-2.41875	0
B2M	-2.42476	0
RPL10	-2.45225	0
RPS18	-2.46547	0
RPL26	-2.48265	0
APOE	-2.48787	0
RPLP2	-2.61655	0
RPL31	-2.62575	0
RPS27	-2.65538	0
RPL34	-2.66466	0
APOC1	-2.746	0
TMSB4X	-2.76251	0
HLA-DRA	-2.80558	0
RPS20	-2.82941	0
RPS29	-2.87665	0
RPL27A	-2.89121	0
RPS17	-3.00037	0
RPL13A	-3.14471	0
RPL21	-3.32459	0
LYZ	-3.41233	0
MALAT1	-4.12666	0
