# Supplementary material for: Single-Cell Transcriptome Analysis Highlights a Role for Neutrophils and Inflammatory Macrophages in the Pathogenesis of Severe COVID-19
Source: Cells. 2020 Oct 29;9(11):2374. doi: 10.3390/cells9112374 (PMC7693119; doi:10.3390/cells9112374)
Supplement: Supplementary file 1 [file cells-09-02374-s001.zip › Supplementary table 4.xlsx]

## Sheet: GE.severe_vs_mild-fold2.0_adjp0
Supplementary table 6. Differentially expressed genes in severe vs mild COVID-19 BAL
GeneID (Regulation criterion: fold > 2.0 and adjp p-value < 0.05)	SystemCode	severe_vs_mild-log_fold	severe_vs_mild-p_value
CCL2	Sy	3.72429	0
MALAT1	Sy	2.8955	0
IFITM2	Sy	2.67154	0
H3F3B	Sy	2.66969	0
SAT1	Sy	2.63373	0
IFITM1	Sy	2.56706	0
NEAT1	Sy	2.49036	0
SRGN	Sy	2.43419	0
S100A8	Sy	2.22123	0
ISG15	Sy	1.96289	0
B2M	Sy	1.94653	0
IFITM3	Sy	1.92382	0
ISG20	Sy	1.87925	0
CXCL8	Sy	1.83998	0
CCL8	Sy	1.82084	0
KLF6	Sy	1.77403	0
NAMPT	Sy	1.76585	0
RSAD2	Sy	1.73523	0
FTH1	Sy	1.7264	3.97434e-266
HLA-B	Sy	1.72053	0
TIMP1	Sy	1.65195	0
CCL3	Sy	1.60395	0
ACTB	Sy	1.60349	4.1912e-279
C15orf48	Sy	1.5867	0
CCL3L1	Sy	1.57729	0
TMSB10	Sy	1.55091	1.05137e-273
DUSP1	Sy	1.52278	0
NFKBIA	Sy	1.51367	0
S100A9	Sy	1.49307	1.35946e-236
CCL7	Sy	1.46481	0
CTSL	Sy	1.44215	2.79247e-218
FCER1G	Sy	1.37471	2.17305e-247
MT2A	Sy	1.36589	2.56838e-215
IL1RN	Sy	1.35938	5.31759e-259
MARCKS	Sy	1.34752	0
CCL4	Sy	1.3344	2.60393e-260
H3F3A	Sy	1.2593	1.42733e-272
HLA-E	Sy	1.25207	3.81975e-301
ZFP36	Sy	1.22165	0
BCL2A1	Sy	1.21531	3.04106e-270
FOS	Sy	1.21323	3.82217e-273
CCL4L2	Sy	1.20994	4.73093e-250
EIF1	Sy	1.18301	2.08045e-281
SH3BGRL3	Sy	1.17574	7.89826e-187
TYMP	Sy	1.15286	2.53567e-229
IER3	Sy	1.15145	0
RNF213	Sy	1.12926	7.54421e-266
HLA-C	Sy	1.1076	3.57039e-168
MX2	Sy	1.07934	1.23556e-293
IER2	Sy	1.07316	8.14792e-306
MX1	Sy	1.05867	6.4949e-203
SPP1	Sy	1.02734	2.61013e-258
SERPINB2	Sy	1.00893	2.33459e-243
CYP27A1	Sy	-1.01173	0
CTSC	Sy	-1.04985	1.64723e-220
MT-CYB	Sy	-1.06419	1.51681e-97
MCEMP1	Sy	-1.0836	0
LGALS3BP	Sy	-1.13796	0
MT-ND5	Sy	-1.1542	1.99444e-131
MT-ND1	Sy	-1.16895	1.24935e-148
MT-ND3	Sy	-1.16964	2.76759e-100
SERPING1	Sy	-1.17377	0
HBB	Sy	-1.17616	1.07086e-263
HLA-DRA	Sy	-1.18115	8.12949e-160
CD74	Sy	-1.25319	3.97174e-132
HLA-DPB1	Sy	-1.27256	0
MS4A7	Sy	-1.28822	0
MT-ND4L	Sy	-1.33071	1.34766e-160
CES1	Sy	-1.33281	0
HLA-DQB1	Sy	-1.34384	0
HLA-DQA2	Sy	-1.36088	0
FN1	Sy	-1.36648	0
HLA-DPA1	Sy	-1.40928	0
HLA-DRB1	Sy	-1.42042	2.27039e-238
ALDH2	Sy	-1.50648	0
MARCO	Sy	-1.54367	0
MT-ND6	Sy	-1.57581	2.88581371198e-313
HLA-DRB5	Sy	-1.61748	0
HLA-DQA1	Sy	-1.69255	0
APOE	Sy	-1.83532	0
FABP4	Sy	-1.98825	0
C1QA	Sy	-2.36729	0
C1QC	Sy	-2.4009	0
MT-ATP8	Sy	-2.57005	0
NUPR1	Sy	-2.57571	0
C1QB	Sy	-2.57857	0
APOC1	Sy	-3.14015	0
