# Supplementary material for: Single-Cell Transcriptome Analysis Highlights a Role for Neutrophils and Inflammatory Macrophages in the Pathogenesis of Severe COVID-19
Source: Cells. 2020 Oct 29;9(11):2374. doi: 10.3390/cells9112374 (PMC7693119; doi:10.3390/cells9112374)
Supplement: Supplementary file 1 [file cells-09-02374-s001.zip › Supplementary table 5.xls]

## Sheet: Sheet0
Supplementary table 5. Disease and function analysis for mild and severe COVID-19 BAL cells compared to healthy subjects.
Diseases and Bio Functions	GE.severe_vs_control-fold2.0_adjp0.05 - 2020-05-23 01:55 PM	GE.mild_vs_control-fold2.0_adjp0.05 - 2020-05-23 01:56 PM
Replication of RNA virus	-3.412	-3.249
Viral Infection	-3.198	-2.922
Multiple Sclerosis	2.985	2.63
Relapsing-remitting multiple sclerosis	2.985	2.63
Inflammatory response	3.408	1.994
Replication of Influenza A virus	-2.414	-2.729
Replication of Flaviviridae	-2.584	-2.383
Replication of Influenza virus	-2.199	-2.496
Replication of Hepatitis C virus	-2.408	-2.19
Replication of vesicular stomatitis virus	-2.596	-1.96
Activation of myeloid cells	2.148	2.196
Activation of phagocytes	2.148	2.196
Replication of virus	-3.602	N/A
Chemotaxis of myeloid cells	3.262	N/A
Infection of kidney cell lines	-2.011	-1.237
Chemotaxis of phagocytes	3.103	N/A
Chemotaxis of monocytes	3.084	N/A
Cell movement of granulocytes	3.07	N/A
Chemotaxis of leukocytes	3.013	N/A
Inflammatory demyelinating disease	2.985	N/A
Cell movement of PBMCs	2.925	N/A
Cell movement of phagocytes	2.906	N/A
Leukocyte migration	2.881	N/A
Cell movement of leukocytes	2.878	N/A
Cell movement of neutrophils	2.862	N/A
Chemotaxis of mononuclear leukocytes	2.838	N/A
Cell movement of mononuclear leukocytes	2.812	N/A
Chemotaxis of granulocytes	2.784	N/A
Cell movement of peripheral blood monocytes	2.608	N/A
Binding of tumor cell lines	2.544	N/A
Adhesion of tumor cell lines	2.544	N/A
Migration of phagocytes	2.442	N/A
Chemotaxis of peripheral blood monocytes	2.433	N/A
Infection by Flaviviridae	-2.429	N/A
Migration of mononuclear leukocytes	2.405	N/A
Chemotaxis of neutrophils	2.38	N/A
Activation of lymphocytes	N/A	-2.236
Migration of PBMCs	2.219	N/A
Chemotaxis of eosinophils	2.177	N/A
Migration of monocytes	2.166	N/A
Cell movement of T lymphocytes	2.081	N/A
Cell movement of lymphocytes	2.044	N/A
Lymphocyte migration	2.042	N/A
Cell movement of natural killer cells	2	N/A
Activation of T lymphocytes	N/A	-2
Migration of peripheral blood monocytes	2	N/A
Replication of Murine herpesvirus 4	-2	N/A
