# Supplementary material for: Single-Cell Transcriptome Analysis Highlights a Role for Neutrophils and Inflammatory Macrophages in the Pathogenesis of Severe COVID-19
Source: Cells. 2020 Oct 29;9(11):2374. doi: 10.3390/cells9112374 (PMC7693119; doi:10.3390/cells9112374)
Supplement: Supplementary file 1 [file cells-09-02374-s001.zip › Supplementary table 6.xlsx]

## Sheet: Sheet0
Supplementary table 6. Disease and function comparing Severe and mild COVID-19 BAL
Categories	Diseases or Functions Annotation	p-value	Predicted Activation State	Activation z-score	Molecules	# Molecules
Cellular Movement,Hematological System Development and Function,Immune Cell Trafficking,Inflammatory Response	Chemotaxis of phagocytes	4.08e-10	Increased	2.823	CCL2,CCL3,CCL3L1,CCL4,CCL7,CCL8,CXCL8,MT-ND1,S100A8,S100A9,SPP1	11
Cellular Movement	Chemotaxis of myeloid cells	3.85e-10	Increased	2.821	CCL2,CCL3,CCL3L1,CCL4,CCL7,CCL8,CXCL8,MT-ND1,S100A8,S100A9,SPP1	11
Cellular Movement,Hematological System Development and Function,Immune Cell Trafficking,Inflammatory Response	Cell movement of neutrophils	6.13e-12	Increased	2.611	CCL2,CCL3,CCL4,CCL7,CCL8,CXCL8,FN1,MT-ND1,S100A8,S100A9,SPP1	11
Cellular Movement,Hematological System Development and Function,Immune Cell Trafficking,Inflammatory Response	Chemotaxis of leukocytes	6.73e-10	Increased	2.607	CCL2,CCL3,CCL3L1,CCL4,CCL7,CCL8,CD74,CXCL8,MT-ND1,S100A8,S100A9,SPP1	12
Cell Signaling,Molecular Transport,Vitamin and Mineral Metabolism	Quantity of Ca2+	8.86e-05	Increased	2.591	CCL2,CCL3,CCL4,CCL7,CXCL8,S100A8,S100A9	7
Cellular Movement	Cell movement of myeloid cells	1.68e-09	Increased	2.584	CCL2,CCL3,CCL3L1,CCL4,CCL7,CCL8,CXCL8,FN1,MT-ND1,S100A8,S100A9,SPP1	12
Cellular Movement,Hematological System Development and Function,Immune Cell Trafficking,Inflammatory Response	Chemotaxis of monocytes	6.14e-08	Increased	2.579	CCL2,CCL3,CCL3L1,CCL4,CCL7,CCL8,CXCL8	7
Cellular Movement,Hematological System Development and Function,Immune Cell Trafficking,Inflammatory Response	Chemotaxis of mononuclear leukocytes	1.96e-08	Increased	2.442	CCL2,CCL3,CCL3L1,CCL4,CCL7,CCL8,CD74,CXCL8,SPP1	9
Cellular Development,Cellular Growth and Proliferation,Organ Development,Skeletal and Muscular System Development and Function,Tissue Development	Proliferation of smooth muscle cells	1.99e-05	Increased	2.439	APOE,CCL2,CCL3,CXCL8,FOS,SPP1	6
Cellular Movement,Hematological System Development and Function,Immune Cell Trafficking,Inflammatory Response	Cell movement of phagocytes	1.48e-10	Increased	2.41	CCL2,CCL3,CCL3L1,CCL4,CCL7,CCL8,CXCL8,FN1,MT-ND1,S100A8,S100A9,SPP1,TIMP1	13
Cellular Movement,Hematological System Development and Function,Immune Cell Trafficking	Cell movement of PBMCs	3.95e-07	Increased	2.403	CCL2,CCL3,CCL4,CCL7,CCL8,CXCL8	6
Cellular Movement	Chemotaxis	4.41e-08	Increased	2.391	CCL2,CCL3,CCL3L1,CCL4,CCL7,CCL8,CD74,CXCL8,FN1,MT-ND1,S100A8,S100A9,SPP1	13
Cellular Movement,Hematological System Development and Function,Immune Cell Trafficking,Inflammatory Response	Cell movement of monocytes	7.08e-08	Increased	2.3	CCL2,CCL3,CCL3L1,CCL4,CCL7,CCL8,CXCL8,FN1	8
Cellular Movement	Migration of cells	4.36e-07	Increased	2.299	APOE,CCL2,CCL3,CCL3L1,CCL4,CCL7,CCL8,CD74,CTSL,CXCL8,FCER1G,FN1,FOS,IFITM1,IFITM3,KLF6,LGALS3BP,MALAT1,MT-ND1,NFKBIA,S100A8,S100A9,SPP1,SRGN,TIMP1,TMSB10/TMSB4X	26
Molecular Transport	Quantity of metal	2.58e-06	Increased	2.283	B2M,CCL2,CCL3,CCL4,CCL7,CXCL8,FTH1,S100A8,S100A9	9
Cellular Movement,Hematological System Development and Function,Immune Cell Trafficking,Inflammatory Response	Chemotaxis of neutrophils	1.25e-10	Increased	2.23	CCL2,CCL3,CCL7,CCL8,CXCL8,MT-ND1,S100A8,S100A9,SPP1	9
Cellular Movement,Hematological System Development and Function,Immune Cell Trafficking	Migration of PBMCs	4.77e-07	Increased	2.219	CCL2,CCL3,CCL4,CCL7,CXCL8	5
Cellular Movement,Hematological System Development and Function,Immune Cell Trafficking,Inflammatory Response	Cell movement of peripheral blood monocytes	2.63e-07	Increased	2.207	CCL2,CCL3,CCL4,CCL8,CXCL8	5
Cell Morphology	Shape change of blood cells	4.54e-08	Increased	2.193	CCL2,CCL3,CCL7,CCL8,CXCL8,FN1	6
Cell Morphology,Hematological System Development and Function,Hypersensitivity Response	Shape change of basophils	3.02e-10	Increased	2.183	CCL2,CCL3,CCL7,CCL8,CXCL8	5
Cellular Movement	Cell movement	4.25e-09	Increased	2.164	ACTB,APOE,CCL2,CCL3,CCL3L1,CCL4,CCL7,CCL8,CD74,CTSL,CXCL8,FCER1G,FN1,FOS,IER2,IFITM1,IFITM3,KLF6,LGALS3BP,MALAT1,MARCKS,MT-ND1,MX1,NAMPT,NFKBIA,S100A8,S100A9,SPP1,SRGN,TIMP1,TMSB10/TMSB4X	31
Cell-To-Cell Signaling and Interaction	Binding of tumor cell lines	2.2e-07	Increased	2.137	APOE,CCL2,CCL3,CCL4,CXCL8,FN1,FOS,LGALS3BP,MARCKS,NFKBIA,SERPINB2,SPP1,SRGN	13
Inflammatory Response	Inflammatory response	5.49e-20	Increased	2.105	APOE,CCL2,CCL3,CCL3L1,CCL4,CCL7,CCL8,CD74,CXCL8,FOS,LGALS3BP,MT-CYB,MT-ND1,MT-ND3,MT-ND4L,MT-ND5,MT-ND6,NEAT1,NFKBIA,S100A8,S100A9,SERPING1,SPP1,TMSB10/TMSB4X	24
Cell Signaling,Molecular Transport,Vitamin and Mineral Metabolism	Mobilization of Ca2+	0.000771	Increased	2.087	CCL2,CCL3,CCL4,CCL7,CXCL8,FCER1G	6
Cellular Movement	Invasion of cells	3.36e-09	Increased	2.046	CCL2,CD74,CES1,CTSL,CXCL8,DUSP1,FN1,FOS,IER3,IFITM1,IFITM3,KLF6,MALAT1,MARCKS,MX1,NAMPT,NFKBIA,S100A9,SPP1,SRGN,TIMP1,TMSB10/TMSB4X,ZFP36	23
Cellular Movement,Hematological System Development and Function,Immune Cell Trafficking,Inflammatory Response	Migration of phagocytes	6.64e-09	Increased	2.034	CCL2,CCL3,CCL4,CCL7,CCL8,CXCL8,FN1,SPP1,TIMP1	9
Cellular Movement	Chemotaxis of germ cell tumor cell lines	1.04e-08	Increased	2	CCL2,CCL3,CCL4,CXCL8	4
Cellular Movement,Hematological System Development and Function,Immune Cell Trafficking,Inflammatory Response	Migration of peripheral blood monocytes	5.27e-07	Increased	2	CCL2,CCL3,CCL8,CXCL8	4
Infectious Diseases	Replication of virus	7.17e-11	Decreased	-2.068	B2M,CCL2,CCL3,CCL3L1,CCL4,CES1,CXCL8,DUSP1,IFITM1,IFITM2,IFITM3,ISG15,ISG20,MX1,MX2,RSAD2,S100A8,S100A9	18
Cell Death and Survival	Cell death of mononuclear leukocytes	0.00101	Decreased	-2.197	CCL3,CCL4,FTH1,S100A8,SPP1	5
Infectious Diseases	Infectivity of virus	1.3e-06	Decreased	-2.2	APOC1,CCL2,CCL3,CCL4,FN1	5
Infectious Diseases	Infection by Flaviviridae	9.9e-08	Decreased	-2.213	APOE,CCL2,CCL4,CXCL8,IFITM2,IFITM3,ISG20,RSAD2,SPP1	9
Cell Signaling	Replication of viral replicon	1.65e-09	Decreased	-2.599	IFITM1,IFITM2,IFITM3,ISG15,ISG20,MX1,RSAD2	7
Cell Death and Survival	Apoptosis of leukocytes	4.17e-05	Decreased	-2.6	CCL3,CCL4,CXCL8,IL1RN,NAMPT,S100A8,SPP1	7
Cell Death and Survival	Cell death of immune cells	2.51e-07	Decreased	-2.647	CCL3,CCL4,CXCL8,FN1,FTH1,IL1RN,MX1,NAMPT,NFKBIA,S100A8,SPP1	11
