# Supplementary material for: Single-Cell Transcriptome Analysis Highlights a Role for Neutrophils and Inflammatory Macrophages in the Pathogenesis of Severe COVID-19
Source: Cells. 2020 Oct 29;9(11):2374. doi: 10.3390/cells9112374 (PMC7693119; doi:10.3390/cells9112374)
Supplement: Supplementary file 1 [file cells-09-02374-s001.zip › Supplementary table 7.xlsx]

## Sheet: GE.COVID-19_vs_Control-fold2.0_
Supplementary table 7. Differentially expressed genes in PBMCs from COVID-19 vs control
GeneID (Regulation criterion: fold > 2.0 and rawp p-value < 0.05)	SystemCode	COVID-19_vs_Control-log_fold	COVID-19_vs_Control-p_value
IFI27	Sy	4.974	0.00123725
IGHG1	Sy	4.91516	2.85679e-06
IGLV3-25	Sy	4.6719	1.92242e-05
IGLV3-19	Sy	4.60013	5.03722e-05
IGHG4	Sy	4.51773	0.00175146
DEFA1B	Sy	4.46362	0.00248178
IGHV3-30	Sy	4.06838	0.000827387
IGHG3	Sy	4.01629	1.03919e-05
IGLJ3	Sy	3.99626	0.000159624
IGKV1D-39	Sy	3.92339	0.000348049
IGKJ3	Sy	3.90911	0.000294175
IGKJ1	Sy	3.76162	8.5751e-05
RNASE2	Sy	3.65528	5.26487e-07
IGLC2	Sy	3.65108	0.000220459
IGKV2-30	Sy	3.59543	4.5546e-05
IGLV3-1	Sy	3.54985	0.00156674
IGLV3-10	Sy	3.41043	0.00974988
IGHV3-15	Sy	3.40386	6.21076e-05
IGKV3-11	Sy	3.40038	0.000394259
IGHGP	Sy	3.39507	0.000183861
IGHV3-20	Sy	3.38656	0.000857551
S100A8	Sy	3.33435	6.54919e-07
IGKV1-33	Sy	3.31383	0.000591263
IGKJ4	Sy	3.3086	0.000875372
IGLV3-21	Sy	3.29767	2.13848e-05
IGLV1-51	Sy	3.29501	0.00301907
IGHV3-7	Sy	3.29004	0.00101354
IGHJ1	Sy	3.25353	0.00172891
IGKV1-9	Sy	3.24474	0.00016952
DEFA3	Sy	3.24317	0.020584
DEFA1	Sy	3.23833	0.0139732
IGHV3-48	Sy	3.19816	0.0032767
CLU	Sy	3.1807	5.30625e-07
RETN	Sy	3.17703	6.98176e-06
IGLC1	Sy	3.15582	0.000245319
IGLV5-45	Sy	3.14457	0.00571754
IGLJ2	Sy	3.12858	0.00325418
IGKJ5	Sy	3.12159	2.56098e-05
S100A12	Sy	3.11226	4.04048e-06
IGKV3-20	Sy	3.08868	0.00183482
IGHV3-11	Sy	3.07232	0.000354139
IGHV3-33	Sy	3.05942	0.006118
IGKV1-39	Sy	3.04691	0.00116604
IGHJ5	Sy	3.02702	0.00266205
IGHJ3	Sy	3.02686	0.00389838
IGLV2-14	Sy	3.02063	0.000637104
IGLV6-57	Sy	3.0042	0.00154424
FCGR1A	Sy	2.99616	1.18573e-05
IGHJ4	Sy	2.98169	0.00238125
IGHV3-43	Sy	2.95617	0.00182093
JCHAIN	Sy	2.92502	0.00117418
IGKJ2	Sy	2.89672	0.0106689
IGHV3-23	Sy	2.85479	0.00103563
IGHV7-4-1	Sy	2.85471	0.00455996
IGHV3-66	Sy	2.83143	0.00274575
RNASE1	Sy	2.83047	0.0003362
TXNDC5	Sy	2.82155	0.000247256
IGKV2D-28	Sy	2.81507	0.00149522
IGLV7-46	Sy	2.75843	0.000190847
S100A9	Sy	2.74126	1.37198e-05
IGLV4-69	Sy	2.73194	0.00237056
IGKC	Sy	2.72356	0.00132758
IGHV4-4	Sy	2.69194	0.00135486
AC008750.4	Sy	2.6779	0.000280765
IGKV4-1	Sy	2.63644	0.00435538
IGLC3	Sy	2.62955	0.00645186
IGHV2-5	Sy	2.62165	0.00571459
IGLV1-47	Sy	2.6133	0.0151951
IGLV3-27	Sy	2.60127	0.00132473
IGLV1-44	Sy	2.60076	0.00433214
IGHV3OR16-13	Sy	2.59199	0.00165637
H2AC14	Sy	2.58756	0.00118304
IGKV1-12	Sy	2.5628	0.00642083
IGHJ2	Sy	2.55945	0.0133512
IFITM3	Sy	2.54837	0.000227303
ELL2	Sy	2.54687	6.4941e-05
IGHV4-39	Sy	2.49108	0.00675237
MZB1	Sy	2.48746	0.000204826
IGLV2-23	Sy	2.48705	0.000173552
IGKV1-17	Sy	2.45494	0.0133946
SOCS3	Sy	2.45099	2.99004e-07
MCEMP1	Sy	2.43471	1.28737e-06
IGHV3-13	Sy	2.40911	0.0215246
IGHV1-24	Sy	2.39877	0.0187152
IGLV1-40	Sy	2.39572	0.0267217
IGLV2-11	Sy	2.3735	0.0040648
IGHV4-34	Sy	2.36802	0.00106648
IGHV5-51	Sy	2.35914	0.0107323
IGHV2-70	Sy	2.32494	0.00310394
IGHV1-18	Sy	2.31527	0.0068502
AC008763.3	Sy	2.29659	0.010467
IGHV3-73	Sy	2.26538	0.0411628
DERL3	Sy	2.25487	0.00145633
IGKV1-16	Sy	2.23267	0.0176728
PF4	Sy	2.23207	0.00417385
PLBD1	Sy	2.22619	4.59414e-05
IGHV3-21	Sy	2.21981	0.0171586
CES1	Sy	2.20914	1.34602e-05
IFI6	Sy	2.20563	0.0030312
IGHV3-74	Sy	2.20373	0.0170992
IGHG2	Sy	2.18716	0.0235079
IFI44L	Sy	2.17905	0.00173165
IGHV4-59	Sy	2.15672	0.0212721
IGKV3-15	Sy	2.12697	0.0115642
MYBL2	Sy	2.12383	0.000578673
AC005899.5	Sy	2.12254	0.00374323
AC125611.3	Sy	2.11037	0.0178223
IFI44	Sy	2.08595	0.000465383
IGKV1-5	Sy	2.07373	0.0237933
MYL9	Sy	2.0645	0.0023605
IGKV2-24	Sy	2.06201	0.0258091
CAMP	Sy	2.0217	0.00681104
IGHV6-1	Sy	2.02066	0.0120743
SIGLEC1	Sy	2.01329	0.00721776
IGLV7-43	Sy	2.00899	0.0149893
IGHM	Sy	2.00698	0.0306516
APOBEC3B	Sy	1.99946	0.00619936
IGKV1D-16	Sy	1.98773	0.0287461
IGHV3-64	Sy	1.98583	0.0273888
H1-5	Sy	1.97435	0.00195996
IGLL5	Sy	1.96082	0.0084107
IGLV9-49	Sy	1.9553	0.00917062
VCAN	Sy	1.94789	0.000424233
CXCL8	Sy	1.92929	0.005613
GP1BB	Sy	1.91124	0.00252763
PPBP	Sy	1.91042	0.00505448
IGHA2	Sy	1.91021	0.0167244
IGKV1-27	Sy	1.89354	0.0214811
CCR2	Sy	1.89141	0.000353346
TRIB1	Sy	1.88276	3.29445e-05
NUS1P1	Sy	1.87784	0.000530933
AC025423.2	Sy	1.87463	0.00929067
ADM	Sy	1.86763	9.73349e-05
IGHV1-3	Sy	1.86239	0.0271659
CCR1	Sy	1.85378	0.000425811
FCGR1B	Sy	1.85028	0.000222802
IGHV2-26	Sy	1.84524	0.0379569
IGHA1	Sy	1.84409	0.0221313
IGLV2-8	Sy	1.82947	0.0239667
IGHV4-31	Sy	1.81667	0.00772612
OTOF	Sy	1.81245	0.0135028
IGHV5-10-1	Sy	1.80556	0.00101852
SPARC	Sy	1.79514	0.00148157
IGHV3-53	Sy	1.78929	0.0278973
FCGR1CP	Sy	1.77997	5.63728e-05
LMNB1	Sy	1.77263	8.02574e-06
IGHV1-69D	Sy	1.77082	0.0317425
AC012254.2	Sy	1.76548	0.00116418
PLSCR1	Sy	1.76168	0.000180281
HLX	Sy	1.74625	0.000140205
ACRBP	Sy	1.72677	0.00515812
ISG15	Sy	1.72652	0.0105488
AQP9	Sy	1.71222	0.00297061
IGKV2D-29	Sy	1.71201	0.0321728
IGLV3-16	Sy	1.71027	0.016353
TNFRSF17	Sy	1.70519	0.000715605
IGHV1-46	Sy	1.70324	0.0496092
LCN2	Sy	1.69809	0.00144466
DEFA4	Sy	1.69644	0.0163006
CD14	Sy	1.68216	0.00402796
IGLC6	Sy	1.6718	0.00686604
CAVIN3	Sy	1.67115	3.57375e-06
C1DP1	Sy	1.66965	0.010336
H2AC6	Sy	1.66513	0.00125005
F13A1	Sy	1.64734	0.00172
AC026464.4	Sy	1.62482	0.0143318
MIR3661	Sy	1.62159	0.00192128
GAS6	Sy	1.61858	9.02614e-08
NFE2	Sy	1.61174	0.000260374
IGLV8-61	Sy	1.60426	0.0247563
SPCS3	Sy	1.60287	0.00020082
MS4A4A	Sy	1.60096	6.47528e-05
AC145207.4	Sy	1.59322	0.0038631
ITGA2B	Sy	1.59137	0.000346178
HP	Sy	1.59119	0.00111937
DYSF	Sy	1.59076	2.70411e-05
AC022966.2	Sy	1.58766	0.00329259
C1QB	Sy	1.58618	0.00165813
IGKV1-6	Sy	1.58251	0.0356582
LGALS1	Sy	1.58176	3.68776e-05
IFIT3	Sy	1.579	0.00746305
HSP90B1	Sy	1.56316	0.00266549
CMPK2	Sy	1.54973	0.00888411
NT5DC2	Sy	1.54145	0.000180504
H3C10	Sy	1.53636	0.0029526
HBM	Sy	1.53383	0.00553285
CLIC4	Sy	1.52731	1.14326e-05
LTF	Sy	1.51679	0.0137465
SNORD42A	Sy	1.5166	0.0241386
CKAP4	Sy	1.50862	4.53581e-06
H3C2	Sy	1.49911	0.000158422
IGKV1-8	Sy	1.4956	0.00705619
RSAD2	Sy	1.49125	0.0077369
SLPI	Sy	1.48876	0.000101422
ELANE	Sy	1.48199	0.00508323
GP9	Sy	1.48098	0.00364352
UBE2J1	Sy	1.48002	2.37754e-05
CD38	Sy	1.47806	0.00311463
NRGN	Sy	1.47475	0.0110043
MX1	Sy	1.47318	0.00282154
PDIA4	Sy	1.45866	0.00118715
TREML1	Sy	1.44586	0.00175692
NIBAN2	Sy	1.43992	0.000202077
MPO	Sy	1.43829	0.000862875
FAM3C2	Sy	1.43803	0.00576581
EPSTI1	Sy	1.4274	5.80208e-05
ACSL1	Sy	1.42511	0.000619688
UBE2C	Sy	1.42253	0.000186593
UTS2	Sy	1.41733	0.00786055
PRDM1	Sy	1.41414	7.58966e-05
XBP1	Sy	1.40945	0.00171146
FOLR3	Sy	1.39348	0.0125929
FPR1	Sy	1.38891	0.00248487
MANF	Sy	1.38889	0.00161618
VCAN-AS1	Sy	1.38241	0.016674
CD163	Sy	1.37984	0.00928929
LAP3	Sy	1.37949	0.00229586
H2AC12	Sy	1.37739	0.000652948
GNG11	Sy	1.37624	0.00856542
CXCL2	Sy	1.37183	0.0011947
LILRB4	Sy	1.36999	0.000220416
H4C14	Sy	1.36304	0.0236396
TUBB1	Sy	1.36296	0.0357611
IFIT1	Sy	1.35891	0.0197931
H4C8	Sy	1.35476	0.000956763
CCNA2	Sy	1.35064	0.00392023
PIM1	Sy	1.34286	1.74955e-06
H2AC18	Sy	1.34247	9.03624e-05
STAB1	Sy	1.33599	0.00366786
OASL	Sy	1.33111	0.00491102
CDC20	Sy	1.32877	0.00864028
MKI67	Sy	1.31671	0.0107315
OAS2	Sy	1.31454	0.010298
CAVIN2	Sy	1.31345	0.0331319
SEC11C	Sy	1.3132	0.00341221
CD36	Sy	1.3126	0.00151735
MNDA	Sy	1.31044	0.00980113
HMGB3	Sy	1.30438	9.38189e-06
H2AC8	Sy	1.30152	0.00098107
IGKV6-21	Sy	1.29965	0.00525481
USP18	Sy	1.2974	0.0181949
IGKV1D-33	Sy	1.29604	0.0294772
F5	Sy	1.29493	0.000240494
ASGR2	Sy	1.29444	0.00044018
ITM2C	Sy	1.29243	0.0156893
IL1RN	Sy	1.28768	0.000561825
CDKN1A	Sy	1.28764	0.00708846
BUB1	Sy	1.28523	0.000402778
TENT5C	Sy	1.28487	0.00375323
AL133467.1	Sy	1.28458	0.000740288
IGHV3OR16-8	Sy	1.28129	0.00362859
CSTA	Sy	1.28048	0.00243847
SSR3	Sy	1.27655	0.00051481
IRF4	Sy	1.27226	0.00883596
GCA	Sy	1.27127	0.0016611
CYP1B1	Sy	1.26464	0.00731872
TYMP	Sy	1.261	0.00903844
H4C11	Sy	1.25889	0.002145
SLC38A5	Sy	1.25555	0.0192254
PPIB	Sy	1.25399	0.000481082
PTTG1	Sy	1.2534	0.00570052
C1QC	Sy	1.2531	0.00613902
AL355922.1	Sy	1.25296	0.000567883
CTSG	Sy	1.24652	0.0327465
S100P	Sy	1.24631	0.0138752
PRDX4	Sy	1.24152	0.00101166
MTHFD2	Sy	1.24144	3.10741e-05
FABP5	Sy	1.22951	4.5296e-05
H4C3	Sy	1.22766	0.00801113
PTCRA	Sy	1.22526	0.00812962
PDIA6	Sy	1.22506	0.00107441
PARP9	Sy	1.22455	0.000607843
IGHV4-55	Sy	1.22326	0.0293525
SIRPA	Sy	1.22119	0.00732508
IFI27L1	Sy	1.22098	0.000948585
FAM20A	Sy	1.21872	1.95303e-05
ANPEP	Sy	1.21442	0.00448762
H2BC11	Sy	1.21402	0.00356755
RNASE3	Sy	1.21251	8.82675e-05
CENPW	Sy	1.20633	0.000326927
H3P6	Sy	1.20512	0.00274516
ADAM19	Sy	1.20358	1.78359e-05
SCO2	Sy	1.19784	0.020114
GRN	Sy	1.18727	0.00959582
MYDGF	Sy	1.1872	0.000502367
GGH	Sy	1.18348	0.00147011
SNORD87	Sy	1.1834	0.0489366
PLAAT2	Sy	1.18226	0.00158153
HRH2	Sy	1.17872	0.00175265
DNAJB11	Sy	1.17713	0.000569141
CYCS	Sy	1.1755	0.000430584
CTSA	Sy	1.17086	2.97336e-05
FKBP11	Sy	1.16607	0.00734994
IFI30	Sy	1.16402	0.0150697
QPCT	Sy	1.16372	0.00412711
CDKN3	Sy	1.16306	0.00320986
AL139260.3	Sy	1.16021	0.00387012
BX005040.3	Sy	1.1588	0.0307861
AC135068.2	Sy	1.1582	0.00748247
TK1	Sy	1.14815	0.00608015
AC103563.5	Sy	1.14642	0.00203355
HSPA5	Sy	1.14622	0.00342632
AC117378.1	Sy	1.14522	0.0245197
EAF2	Sy	1.14363	0.00145047
IGLV4-60	Sy	1.13318	0.0284372
RNU2-63P	Sy	1.13312	0.000449393
RPS10-NUDT3	Sy	1.12897	0.000144733
MAN1A1	Sy	1.12787	0.00525634
CU639417.1	Sy	1.12373	0.0118608
H2BC4	Sy	1.12357	0.000857936
NOP56P1	Sy	1.12336	0.0403342
METTL7B	Sy	1.12207	0.000267666
LY96	Sy	1.1211	0.00516861
H1-2	Sy	1.11555	0.00138465
SPI1	Sy	1.11529	0.00562519
H1-0	Sy	1.11139	0.0232253
SERPINA1	Sy	1.11055	0.0390821
ITGB3	Sy	1.11019	0.00799392
OAS1	Sy	1.10498	0.00953185
TXN	Sy	1.10456	2.03879e-05
MARCO	Sy	1.10395	0.0261456
LMAN1	Sy	1.10244	0.0109925
PKM	Sy	1.10122	6.26827e-05
IGLV1-36	Sy	1.09807	0.0404021
YWHAE	Sy	1.09705	2.25207e-05
TPX2	Sy	1.09689	0.00578376
CREG1	Sy	1.09663	0.00168588
ZWINT	Sy	1.09642	0.0101583
GASK1B	Sy	1.09441	0.0143787
LRRC59	Sy	1.09433	0.000310051
PLAC8	Sy	1.09365	0.000306017
H2AC13	Sy	1.09103	0.000619544
GLUL	Sy	1.08678	0.00349339
TNFRSF13B	Sy	1.08361	0.0132755
ATOX1	Sy	1.08355	3.61218e-05
RNU6-917P	Sy	1.07953	0.0137724
SEC61B	Sy	1.07717	3.43279e-05
H2BC5	Sy	1.07255	0.00304698
IGHV3-62	Sy	1.07132	0.0382274
PGD	Sy	1.07116	0.00193021
PRKAR2B	Sy	1.06911	0.0335358
IFNGR2	Sy	1.06782	0.00560401
AL356488.2	Sy	1.06242	0.0318506
SDF2L1	Sy	1.06206	0.00387814
EIF1AY	Sy	1.05989	0.0176707
BOLA2B	Sy	1.0594	0.000145051
BLVRA	Sy	1.05778	0.00703511
IGLVI-70	Sy	1.05624	0.0361889
GNA15	Sy	1.05572	0.00436382
TLR2	Sy	1.05528	0.0203266
PSAT1	Sy	1.051	0.00241753
TXNDC17	Sy	1.05085	0.000242762
RAB20	Sy	1.05081	0.0112891
CDC6	Sy	1.0484	0.00400667
CYBB	Sy	1.04803	0.0313139
PKMYT1	Sy	1.04545	0.000723562
RRBP1	Sy	1.04543	0.000581187
H2AC17	Sy	1.0414	0.00865986
IFI27L2	Sy	1.03222	0.00069538
RGS18	Sy	1.03186	0.0445813
GPX1	Sy	1.0306	0.00944679
BCL2A1	Sy	1.02864	0.0189962
PSMC1P1	Sy	1.02845	0.00171061
AC073610.2	Sy	1.02819	0.0012457
GAPDH	Sy	1.0256	0.000708259
CKS2	Sy	1.02486	0.0147887
NCAPG	Sy	1.01816	0.00170859
EIF1AXP1	Sy	1.01744	0.0173664
SEC61G	Sy	1.01723	1.82448e-05
ATP5MF	Sy	1.01644	3.11882e-05
IGHV3-63	Sy	1.01546	0.0275403
OAS3	Sy	1.01042	0.014158
SUB1	Sy	1.00984	0.00131214
KDELR2	Sy	1.00797	0.000633487
HMMR	Sy	1.00531	0.00165561
CCNB1	Sy	1.00407	0.0169475
TMIGD2	Sy	-1.00172	0.0011177
MIR4671	Sy	-1.00235	0.0167558
SH2D1B	Sy	-1.00298	0.0118548
TRAJ18	Sy	-1.00341	0.00232086
RNU6-179P	Sy	-1.0042	0.000847026
CEROX1	Sy	-1.00491	0.0027107
RNU1-109P	Sy	-1.00511	0.0036929
AC132825.2	Sy	-1.00512	0.0263138
GIMAP7	Sy	-1.0055	0.0164403
TAAR7P	Sy	-1.00591	0.00591134
TRAJ47	Sy	-1.00618	0.0171011
RTN1	Sy	-1.00649	0.0103473
PDE3B	Sy	-1.00813	0.000892979
YPEL3	Sy	-1.00835	0.000171121
HAGHL	Sy	-1.00945	0.000415543
CD160	Sy	-1.01109	0.00641304
TRBC1	Sy	-1.01338	0.00911818
MIR3664	Sy	-1.01366	0.000314124
AP003068.1	Sy	-1.01374	0.00135821
RNU7-93P	Sy	-1.01377	0.0133448
MT-CYB	Sy	-1.01442	2.45905e-05
LILRA4	Sy	-1.01955	0.000317969
ABCB1	Sy	-1.02425	0.000457311
RPL13AP7	Sy	-1.02632	0.000363214
SPSB3	Sy	-1.0265	1.0316e-05
OFD1	Sy	-1.02756	0.000199603
TSPOAP1	Sy	-1.02782	0.00178434
RNU6-136P	Sy	-1.03243	0.00104489
LINC01781	Sy	-1.03295	0.00115914
AC067945.3	Sy	-1.03366	0.000328961
AC010883.3	Sy	-1.03392	3.40357e-05
AL162291.1	Sy	-1.0345	0.00256845
AC092375.2	Sy	-1.03457	9.59863e-05
RNF166	Sy	-1.03505	7.71348e-05
IL2RB	Sy	-1.03528	0.00167543
SNORA25B	Sy	-1.03611	0.0226395
FCMR	Sy	-1.03655	0.000931131
PAXX	Sy	-1.03815	0.000161232
RNU2-42P	Sy	-1.03821	0.0101139
ZBTB16	Sy	-1.03876	0.00547296
LRRN3	Sy	-1.039	0.0232373
AC117503.1	Sy	-1.03948	0.0192088
NOP53	Sy	-1.04254	0.000410696
DUSP2	Sy	-1.04291	0.00691641
MIR1226	Sy	-1.04333	0.000356549
MS4A7	Sy	-1.04342	0.00558031
LTB	Sy	-1.04442	0.00882261
SLC2A4RG	Sy	-1.04988	4.75376e-06
KLRC4	Sy	-1.0499	0.0157237
AC073264.3	Sy	-1.05254	0.00120295
MIR3681	Sy	-1.05329	0.0215822
AMY1A	Sy	-1.05491	0.00120463
EVL	Sy	-1.05527	6.79489e-05
MIR302CHG	Sy	-1.05642	0.000266538
TTC14	Sy	-1.05774	1.19459e-05
MT-CO1	Sy	-1.05804	7.24862e-06
TMEM191A	Sy	-1.05949	2.37941e-06
AC109460.4	Sy	-1.06148	0.000981826
AL137022.1	Sy	-1.0616	0.00110047
MIR3689A	Sy	-1.06303	0.00562197
ANKAR	Sy	-1.06363	9.89495e-05
AC004918.1	Sy	-1.06615	0.00169333
A2M-AS1	Sy	-1.06631	0.00930099
RNU6-220P	Sy	-1.07389	0.00185666
GOLGA8A	Sy	-1.07629	0.00445907
AC138969.1	Sy	-1.07764	1.41231e-05
APBB1	Sy	-1.08053	0.000799213
AC093484.3	Sy	-1.08343	0.0157592
DOC2GP	Sy	-1.08387	7.21901e-05
IL18RAP	Sy	-1.08631	0.00434867
AC092634.5	Sy	-1.08656	0.00244
FAM102A	Sy	-1.09044	0.00285499
AC007347.1	Sy	-1.09428	6.43936e-05
CIRBP	Sy	-1.09566	3.52452e-08
RNU6ATAC22P	Sy	-1.09773	0.000820524
AL121845.1	Sy	-1.09788	0.000807725
AC093726.1	Sy	-1.09879	6.83858e-05
S1PR5	Sy	-1.09955	0.00739391
TRAJ14	Sy	-1.10106	0.0280539
AC243919.1	Sy	-1.10281	0.00226511
AL928654.2	Sy	-1.10477	0.000506391
RNA5SP441	Sy	-1.1051	0.00293999
CRIP2	Sy	-1.106	0.0280304
AL139785.1	Sy	-1.11064	0.00506412
AC012321.1	Sy	-1.11094	0.000240721
TSPAN32	Sy	-1.11193	1.93251e-05
DPEP2	Sy	-1.1188	3.80703e-05
AC004687.1	Sy	-1.12166	2.88439e-05
NELL2	Sy	-1.12168	0.000718526
AC007192.2	Sy	-1.12412	0.000287219
MIR3675	Sy	-1.12534	0.00123335
H2BE1	Sy	-1.12538	1.59296e-05
SNORD10	Sy	-1.12567	0.00532729
AC006213.2	Sy	-1.12639	1.52338e-05
KLRC1	Sy	-1.13076	0.00539944
USP17L9P	Sy	-1.13573	0.0211817
GOLGA8B	Sy	-1.13788	0.00155838
RNU6-790P	Sy	-1.13895	0.00268347
AC055748.1	Sy	-1.14411	0.000334859
AL021707.5	Sy	-1.14559	4.01739e-05
NSUN5P2	Sy	-1.15158	0.00017479
RNU6-1276P	Sy	-1.1517	4.92018e-05
AC027449.1	Sy	-1.15383	0.000234498
RNU6-869P	Sy	-1.15702	0.00150611
RNU6-157P	Sy	-1.15981	0.00566979
NCR3	Sy	-1.16136	0.00147065
AC068775.1	Sy	-1.1628	0.0237469
PDZD4	Sy	-1.16985	0.00618827
SPDYE2	Sy	-1.17888	0.00143188
ZNF683	Sy	-1.18069	0.0205898
AC137590.1	Sy	-1.18483	0.00416405
CCDC7	Sy	-1.19805	0.000269755
BPTFP1	Sy	-1.19867	0.00132511
MIB2	Sy	-1.19926	4.29123e-06
TRAJ35	Sy	-1.19933	0.000482708
KLRK1	Sy	-1.20447	0.000211114
MATK	Sy	-1.20557	2.58805e-05
CTSF	Sy	-1.20901	1.46299e-06
PGGHG	Sy	-1.21086	0.00218165
CD247	Sy	-1.21093	0.00239922
AC090627.1	Sy	-1.21188	0.0011396
RNU6-150P	Sy	-1.21253	0.000486703
TBC1D10C	Sy	-1.21354	5.80077e-06
AL133453.1	Sy	-1.21589	0.0214697
TRBJ1-3	Sy	-1.21762	1.15839e-05
RASSF1	Sy	-1.21777	7.78605e-06
RNU6-674P	Sy	-1.22384	0.000563217
PILRB	Sy	-1.22457	1.68918e-05
AC011495.2	Sy	-1.2383	0.0032875
AK5	Sy	-1.24771	0.000792532
MS4A1	Sy	-1.25198	0.00831556
AL138751.1	Sy	-1.2533	0.000125029
TRAJ5	Sy	-1.26094	0.0385114
AC114546.3	Sy	-1.26338	0.00101015
RNU7-56P	Sy	-1.26487	0.0226389
HLA-DOB	Sy	-1.26656	0.00068821
SAP25	Sy	-1.26716	1.50675e-05
AC133550.2	Sy	-1.2852	0.0132858
AL354798.1	Sy	-1.28878	0.0175372
TRAJ21	Sy	-1.29399	0.00544153
TMEM204	Sy	-1.29971	0.00205732
HDGFP1	Sy	-1.30097	0.0164492
KLRC2	Sy	-1.30103	0.0156101
SIGLEC17P	Sy	-1.30227	8.76964e-06
AC125494.1	Sy	-1.30577	5.27753e-06
RNU6-923P	Sy	-1.3177	0.00111955
AC104984.1	Sy	-1.32035	0.00167273
AL669831.4	Sy	-1.33397	0.000623047
STMN3	Sy	-1.33702	0.000768282
GNLY	Sy	-1.34086	0.010904
MIR1285-2	Sy	-1.35072	0.000331192
FGFBP2	Sy	-1.35075	0.00154163
CD7	Sy	-1.38107	0.000353617
RPS6KB2-AS1	Sy	-1.406	0.0224323
AC005943.2	Sy	-1.41427	0.0348319
TRBJ2-3	Sy	-1.42282	0.00424729
AL591895.1	Sy	-1.43099	3.22079e-06
AC005071.1	Sy	-1.44046	0.000178442
AC079150.1	Sy	-1.44351	0.00826948
CKB	Sy	-1.46468	0.000438335
AP001972.1	Sy	-1.46503	0.000406845
EEF1GP1	Sy	-1.48053	0.020305
CDH12P2	Sy	-1.50487	0.000228729
KLRB1	Sy	-1.5251	7.4342e-05
CD1C	Sy	-1.54693	3.1102e-05
AC009065.1	Sy	-1.55616	0.00027751
AL590491.1	Sy	-1.63415	0.000218968
CLIC3	Sy	-1.63668	0.000378216
AC005306.1	Sy	-1.64769	0.000158737
AC104809.2	Sy	-1.65024	0.0009224
TRAJ22	Sy	-1.65904	0.00201739
MIR3648-2	Sy	-1.66876	0.000118687
MIR3648-1	Sy	-1.66876	0.000118687
MMP23B	Sy	-1.67516	1.8582e-05
AC008038.1	Sy	-1.69387	0.00854839
AC138969.4	Sy	-1.76694	0.000616979
AC126755.4	Sy	-1.76694	0.000616979
CXorf65	Sy	-1.78445	5.66143e-05
AL358781.1	Sy	-1.80525	0.000980288
XIST	Sy	-1.80948	0.017173
VMO1	Sy	-1.9808	0.000325168
AC092069.1	Sy	-1.9973	0.042754
CDKN1C	Sy	-2.13115	0.00160029
AC087633.2	Sy	-2.1456	7.58354e-05
FCER1A	Sy	-2.1509	0.0016393
AL365357.1	Sy	-2.48588	0.0243514
RPL3P4	Sy	-2.97064	0.00753747
RPS4XP22	Sy	-3.78952	6.56071e-05
